# Supplementary material for: LONP1 targets HMGCS2 to protect mitochondrial function and attenuate chronic kidney disease
Source: PubMed Central journal article supplement (PMC9906428; doi:10.15252/emmm.202216581), 2023-01-11
Supplement: EMMM-15-e16581-s001.pdf [file EMMM-15-e16581-s001.pdf]

# **LONP1 Targets HMGCS2 to Protect Mitochondrial Function and Attenuate Chronic Kidney Disease**

Mi Bai<sup>1,2,3\*</sup>, Mengqiu Wu<sup>1,2,3\*</sup>, Mingzhu Jiang<sup>1,2\*</sup>, Jia He<sup>1,2</sup>, Xu Deng<sup>1,2</sup>, Shuang Xu<sup>1,2</sup>, Jiaojiao Fan<sup>1,2</sup>, Mengqiu Miao<sup>1,2</sup>, Ting Wang<sup>1,2</sup>, Yuting Li<sup>1,2</sup>, Xiaowen Yu<sup>1,2,3</sup>, Lin Wang<sup>5</sup>, Yue Zhang<sup>1,2</sup>, Songming Huang<sup>1,2</sup>, Li Yang<sup>4</sup>, Zhanjun Jia<sup>1,2,3</sup>, and Aihua Zhang<sup>1,2,3</sup>

Table of Contents

Appendix Figure S1-3 with their legends

Appendix Table S1

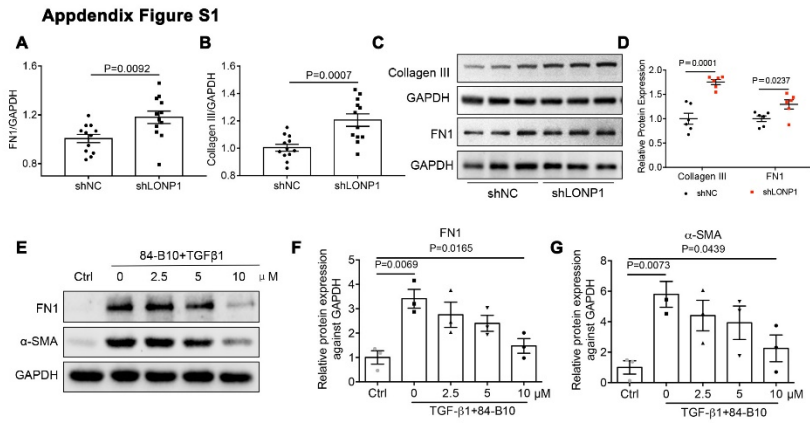

**Appendix Figure S1. The effect of tubular LONP1 and 84-B10 on the activation of NRK-49F cells.**

A, B qRT-PCR analysis of FN1 and Collagen III transcript levels in NRK-49F cells. After interfering LONP1 with shRNA in mPTEC for 24 h, the supernatant was collected to stimulate NRK-49F cells for 24 h. Two independent experiments were carried out (n=12 in each group, biological replicates).

C, D Representative immunoblot and densitometric analysis of FN1 and Collagen III in NRK-49F cells treated as indicated. Two independent experiments were carried out (n=6 in each group, biological replicates).

E-G Representative immunoblot and densitometric analysis of FN1 and  $\alpha$ -SMA in NRK-49F cells treated as indicated. Three independent experiments were carried out and quantification of the abundance of these proteins is shown in panel (n=3 in each group, biological replicates).

Data information: Data are presented as mean  $\pm$  SEM. Student's t-test.

**Appendix Figure S2**

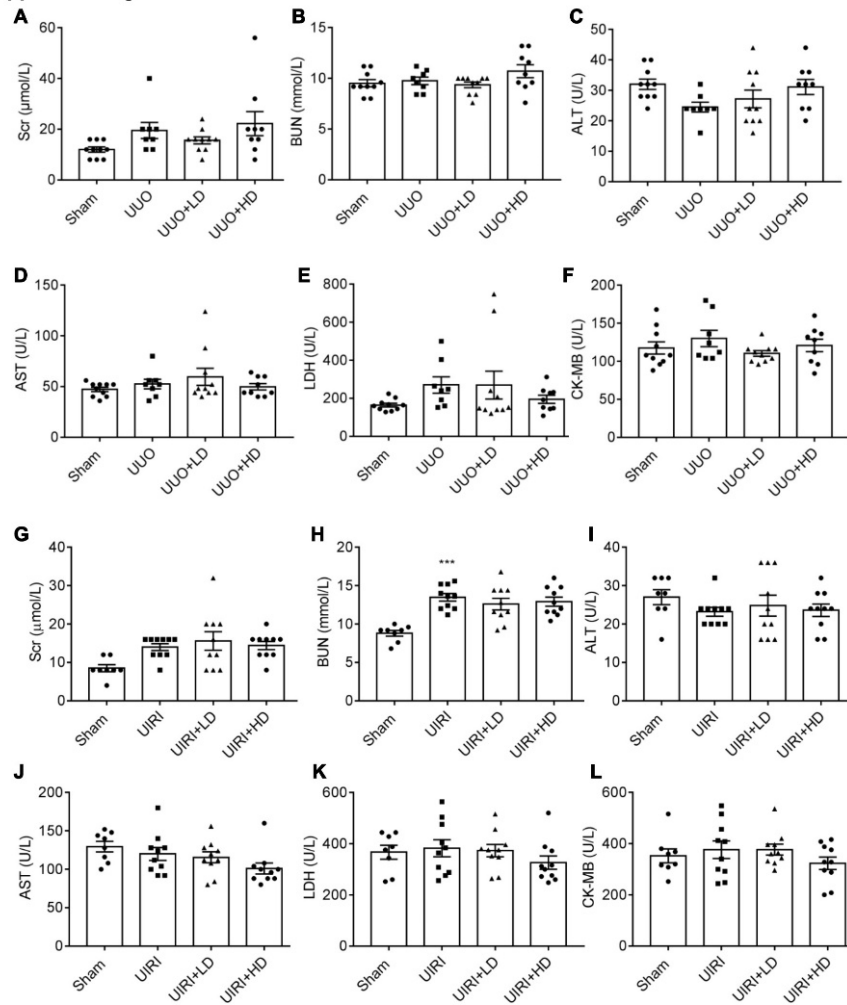

**Appendix Figure S2. The therapeutic doses of 84-B10 had no obvious renal, hepatic, heart and systemic toxicity.**

A-F The mice were pre-treated with low dose (0.5 mg/kg) or high dose (7.5 mg/kg) of 84-B10 before UUU surgery and then treated daily for 7 consecutive days and sacrificed. Serum concentrations of Scr (A), BUN (B), ALT (C), AST (D), LDH (E) and CK-MB (F) were detected (n=9-10 in each group, biological replicates).

G-L The mice were treated with low dose (2.5 mg/kg) or high dose (5 mg/kg) of 84-B10 3 days after UIRI surgery and then treated daily for 19 consecutive days and sacrificed. Serum concentrations of Scr (G), BUN (H), ALT (I), AST (J), LDH (K) and CK-MB (L) were detected (n=8 in Sham group, n=10 in the other three groups, biological replicates).

Data information: Data are presented as mean  $\pm$  SEM.

### Appendix Figure S3

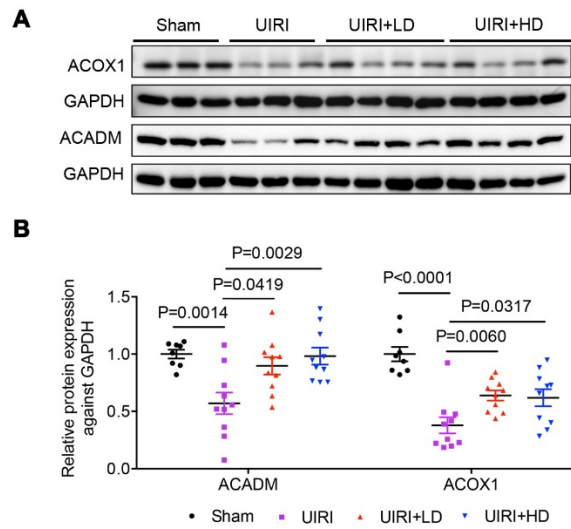

### Appendix Figure S3. The effect of 84-B10 on fatty acid $\beta$ -oxidation (FAO) in UIRI model.

A Representative Western blot images of ACADM and ACOX1 in UIRI model following 84-B10 treatment.

B Densitometric analysis of ACADM and ACOX1 protein levels in UIRI model following 84-B10 treatment (n=8 in Sham group, n=10 in the other three groups, biological replicates).

Data information: Data are presented as mean  $\pm$  SEM. Student's t-test.

**Appendix Table S1. The sequences of the mitochondrial gene's primers.**

| Primer Name | Primer Sequence 5 ' -3 '    |
|-------------|-----------------------------|
| mtNd1-F     | ACACTTATTACAACCCAAGAACACAT  |
| mtNd1-R     | TCATATTATGGCTATGGGTCAGG     |
| mtNd2-F     | CCATCAACTCAATCTCACTTCTATG   |
| mtNd2-R     | GAATCCTGTTAGTGGTGGAAGG      |
| mtNd4-F     | GCTTACGCCAAACAGAT           |
| mtNd4-R     | TAGGCAGAATAGGAGTGAT         |
| mtNd4l-F    | GCCATCTACCTTCTTCA           |
| mtNd4l-R    | TAGGGCTAGTCCTACAGC          |
| mtNd5-F     | GCCAACAACATATTTCAACTTTTC    |
| mtNd5-R     | ACCATCATCCAATTAGTAGAAAGGA   |
| mtNd6-F     | GGGAGATTGGTTGATGTA          |
| mtNd6-R     | ATACCCGCAAACAAAGAT          |
| mtCo1-F     | CAGACCGCAACCTAAACACA        |
| mtCo1-R     | TTCTGGGTGCCCAAAGAAT         |
| mtCo2-F     | GCCGACTAAATCAAGCAACA        |
| mtCo2-R     | CAATGGGCATAAAGCTATGG        |
| mtCo3-F     | CGTGAAGGAACCTACCAAGG        |
| mtCo3-R     | ATCCTGTTGGAGGTCAGCA         |
| mtAtp6-F    | CCATAAATCTAAGTATAGCCATTCCAC |
| mtAtp6-R    | AGCTTTTTAGTTTGTGTGCGGAAG    |
| mtAtp8-F    | ACATTCCCCTGGCACC            |
| mtAtp8-R    | GGGGTAATGAATGAGGC           |
